# Supplementary material for: Awareness of Chronic Kidney Disease, Medication, and Laboratory Investigation among Nephrology and Urology Patients of Quetta, Pakistan
Source: MDPI journal article supplement (doi:10.3390/ijerph19095015), 2022-04-20
Supplement: s1 [file s1]

## Awareness of Chronic Kidney Disease; its medication and laboratory investigation among Nephrology & Urology patients of Quetta.

### QUESTIONNAIRE سوالنامہ

Please tick (✓) your answer to the following questions.

براہ کرم درج ذیل سوالات کے اپنے جواب پر (✓) نشان لگائیں

1. Age عمر: \_\_\_\_\_

2. Gender جنس : ☐ Male مرد ☐ Female عورت

3. Education تعلیم : ☐ Primary School پرائمری اسکول

☐ Secondary School ثانوی اسکول

☐ Intermediate انٹرمیڈیٹ

☐ Graduate گریجویٹ

☐ Post Graduate پوسٹ گریجویٹ

☐ Religious Education دینی تعلیم

☐ No Education کوئی تعلیم نہیں

3. Do you have any of the following disease? / کیا آپ کو مندرجہ ذیل میں سے کوئی بیماری ہے؟

☐ Diabetes mellitus ذیابیطس

☐ Hypertension ہائی بلڈ پریشر

☐ Cardiovascular disease دل کی بیماری

☐ Stress زہنی دباؤ

☐ No Disease کوئی بیماری نہیں

4. Duration of Disease بیماری کی مدت

☐ 0-3 Years ☐ 3-5 Years ☐ More than Five years

5. Life Style: طرز زندگی

- Do you Smoke? کیا آپ سگریٹ نوشی کرتے ہیں؟

☐ Yes ہاں

☐ No نہیں

- Do you exercise 30 mins per day? کیا آپ روزانہ 30 منٹ ورزش کرتے ہیں؟

☐ Yes ہاں

☐ No نہیں

6. CKD Stages: ☐ Stage 1 (GFR 90 or Greater) ☐ Stage 2 (GFR Between 60 and 89)  
☐ Stage 3 (GFR Between 30 and 59) ☐ Stage 4 (GFR Between 15 and 29)  
☐ Stage 5 (GFR Less than 15)

| Please tick (✓) your answer to the following questions.                                                                                                                | Yes<br>ہاں               | No<br>نہیں               | Don't Know<br>پتہ نہیں   |
|------------------------------------------------------------------------------------------------------------------------------------------------------------------------|--------------------------|--------------------------|--------------------------|
| 1. Do you know how to control your blood pressure (BP)?<br>کیا آپ جانتے ہیں کہ آپ اپنے بلڈ پریشر (بی۔پی) کو کس طرح کنٹرول کر سکتے ہیں؟                                 | <input type="checkbox"/> | <input type="checkbox"/> | <input type="checkbox"/> |
| 2. Do you know that person may lead a normal life with one healthy kidney?<br>کیا آپ جانتے ہیں کہ انسان صرف ایک صحت مند گردے کے ساتھ تندرست زندگی گزار سکتا ہے؟        | <input type="checkbox"/> | <input type="checkbox"/> | <input type="checkbox"/> |
| 3. Do you know what symptoms will develop when you get worse?<br>کیا آپ جانتے ہیں کہ آپکی بیماری کے بگڑنے کی صورت میں کون سی علامات پیدا ہوں گی؟                       | <input type="checkbox"/> | <input type="checkbox"/> | <input type="checkbox"/> |
| 4. Do you know what aggravates your kidney function?<br>کیا آپ جانتے ہیں کہ آپ کے گردے کی خرابی کن عوامل سے بڑھ جاتی ہے؟                                               | <input type="checkbox"/> | <input type="checkbox"/> | <input type="checkbox"/> |
| 5. Do you know the long-term prognosis of your disease?<br>کیا آپ کو اپنے مرض کی طویل المیعاد پیچیدگیوں کے بارے میں معلوم ہے؟                                          | <input type="checkbox"/> | <input type="checkbox"/> | <input type="checkbox"/> |
| 6. Do you know the brand names and usage of your medicines?<br>کیا آپ اپنی دوائیوں کے نام اور استعمال سے واقف ہیں؟                                                     | <input type="checkbox"/> | <input type="checkbox"/> | <input type="checkbox"/> |
| 7. Do you know the primary role of your medicines?<br>کیا آپ کو معلوم ہے کہ آپکو دی جانے والی ادویات کیوں دی گئی ہیں؟                                                  | <input type="checkbox"/> | <input type="checkbox"/> | <input type="checkbox"/> |
| 8. Do you know which medicine may impair the kidney function?<br>کیا آپ جانتے ہیں کہ آپکو دی جانے والی ادویات گردوں پہ منفی اثر مرتب کر سکتی ہیں؟                      | <input type="checkbox"/> | <input type="checkbox"/> | <input type="checkbox"/> |
| 9. Do you know Herbal supplements can be effective in treating chronic kidney disease?<br>کیا آپ جانتے ہیں کہ یونانی ادویات گردوں کے دائمی مرض کیلئے مفید ہو سکتی ہیں؟ | <input type="checkbox"/> | <input type="checkbox"/> | <input type="checkbox"/> |

| Please tick (✓) your answer to the following questions.                                                                                                                 | Yes<br>ہاں               | No<br>نہیں               | Don't Know<br>پتہ نہیں   |
|-------------------------------------------------------------------------------------------------------------------------------------------------------------------------|--------------------------|--------------------------|--------------------------|
| 10. Do you know what unhealthy diets are?<br>کیا آپ کو ان غذاؤں کے متعلق علم ہے جو گردوں پر اثر انداز ہوں؟                                                              | <input type="checkbox"/> | <input type="checkbox"/> | <input type="checkbox"/> |
| 11. Do you know which food contains high-quality protein?<br>کیا آپ کو ان غذاؤں کے متعلق علم ہے جن میں پروٹین کی مقدار زیادہ ہو؟                                        | <input type="checkbox"/> | <input type="checkbox"/> | <input type="checkbox"/> |
| 12. Do you know food, which should be avoided, in your condition?<br>کیا آپ کو ان غذاؤں کے متعلق علم ہے جن سے آپ کو اپنی بیماری کی وجہ سے اجتناب کرنا چاہئے؟            | <input type="checkbox"/> | <input type="checkbox"/> | <input type="checkbox"/> |
| 13. Do you know how much salt you should be using daily?<br>کیا آپ جانتے ہیں کہ اس بیماری میں نمک کا کم استعمال کرنا چاہئے؟                                             | <input type="checkbox"/> | <input type="checkbox"/> | <input type="checkbox"/> |
| 14. Do you know what laboratory examinations you should regularly check?<br>کیا آپ جانتے ہیں کہ آپ کو کون سے لیبارٹری ٹیسٹ باقاعدگی سے کرانے چاہئیں؟                    | <input type="checkbox"/> | <input type="checkbox"/> | <input type="checkbox"/> |
| 15. Do you know the meaning of your test reports?<br>کیا آپ اپنے کیے جانے والے لیبارٹری ٹیسٹ کے نتائج کو سمجھ سکتے؟                                                     | <input type="checkbox"/> | <input type="checkbox"/> | <input type="checkbox"/> |
| 16. Do you know what exercise fits you?<br>کیا آپ جانتے ہیں کہ کون سی جسمانی ورزش آپ کے لیے فائدہ مند ہے؟                                                               | <input type="checkbox"/> | <input type="checkbox"/> | <input type="checkbox"/> |
| 17. Do you know how to evaluate your curative effect?<br>کیا آپ جانتے ہیں کہ دی جانے والی ادویات سے آپکی بیماری میں فائدہ ہو رہا ہے؟                                    | <input type="checkbox"/> | <input type="checkbox"/> | <input type="checkbox"/> |
| 18. Do you know how to contact medical staffs when you have a question?<br>کیا آپ جانتے ہیں کہ جب کوئی مشکل پیش آئے تو آپ اپنے معالج (ڈاکٹر) سے کیسے رابطہ کر سکتے ہیں؟ | <input type="checkbox"/> | <input type="checkbox"/> | <input type="checkbox"/> |

END OF QUESTIONS. THANK YOU سوالات کا اختتام۔ شکریہ
